# Supplementary material for: Cinema as a pedagogical tool for empathy training in dental education: A qualitative study
Source: Research Square preprint supplement (doi:10.21203/rs.3.rs-7355136/v1), 2025-09-05
Supplement: Supplementary file 2 [file 50f980c1c8a95105f6b884c8.docx]

**Appendix 3: Table 1: Film-Specific Justification for Empathy Education**

| **Film Title** | **Educational Justification** | **Common Empathy Challenges Addressed** | **Multiple Perspective Representation** | **Theoretical Alignment** |
| --- | --- | --- | --- | --- |
| **Patch Adams** | Selected for its portrayal of unconventional empathic approaches and the balance between professional competence and compassionate care, directly relevant to patient-centred dental practice. Demonstrates how humour and creativity can enhance therapeutic relationships while maintaining clinical effectiveness. | • Balancing professional boundaries with emotional connection  • Overcoming institutional resistance to empathic care  • Managing scepticism about patient-centred approaches  • Addressing criticism of "unprofessional" empathic behaviour | • **Patient perspective:** Vulnerability, need for human connection, impact of empathic vs. detached care  • **Healthcare provider perspective:** Professional obligations, institutional pressures, personal calling to heal  • **Administrative perspective:** Institutional policies, liability concerns, traditional medical training  • **Family perspective:** Hope, desperation, trust in the healthcare system | **SCT**: Charismatic role model demonstrating innovative empathic behaviors with positive outcomes  **TT**: Inspiring transformation narrative creates emotional engagement and identification |
| **Wit** | Chosen for its powerful depiction of patient vulnerability and the impact of healthcare provider communication styles on patient experience. Particularly relevant for students learning to deliver difficult news and maintain dignity during invasive procedures. | • Communicating complex medical information sensitively  • Maintaining patient dignity during vulnerability  • Recognizing emotional needs beyond clinical symptoms  • Avoiding depersonalization of patients  Managing professional detachment vs. emotional engagement | • **Patient perspective:** Fear, loss of autonomy, intellectual coping mechanisms, existential concerns  • **Physician perspective:** Clinical objectivity, research focus, emotional barriers  • **Nurse perspective:** Direct patient care, advocacy, emotional labour  • **Academic perspective:** Intellectual analysis, scholarly detachment, parallel to medical training | **SCT**: Contrasts empathic vs. non-empathic behaviors with clear consequences for observational learning  **TT**: Intellectual protagonist facilitates identification; profound vulnerability creates transportation |
| **50/50** | Included for its authentic portrayal of patient anxiety and the role of healthcare relationships in coping with medical procedures. Highly applicable to dental anxiety management and young adult patient communication. | • Managing patient anxiety and fear  • Supporting patients through uncertainty  • Navigating friend/family dynamics in healthcare  • Addressing young adult patient concerns  • Balancing hope with realistic expectations | • **Patient perspective:** Young adult facing mortality, fear of procedures, need for normalcy  • **Friend perspective:** Helplessness, desire to support, own fears about illness  • **Healthcare provider perspective:** Delivering difficult news, treatment planning, and prognosis discussions  • **Family perspective:** Worry, protective instincts, generational differences in coping | **SCT**: Age-matched role models enhance modeling effectiveness and self-efficacy beliefs  **TT**: Demographic alignment and contemporary setting maximize transportation potential |
| **The King's Speech** | Selected to demonstrate patient dignity, communication challenges, and the therapeutic relationship. Relevant to treating patients with special needs, communication difficulties, or social anxiety. Shows persistence and patience in therapeutic relationships. | • Working with patients who have communication barriers  • Maintaining patient dignity despite difficulties  • Building trust with anxious or reluctant patients  • Addressing shame and embarrassment in healthcare  • Recognizing social/psychological factors in treatment | • **Patient perspective:** Shame, frustration, determination, vulnerability in seeking help  • **Therapist perspective:** Professional dedication, innovative approaches, personal investment  • **Family perspective:** Support, expectations, political/social pressures  • **Public perspective:** Judgment, expectations, and social stigma around disabilities | **SCT**: Models patience and persistence in therapeutic relationships with clear behavioral strategies  **TT**: Underdog narrative and overcoming adversity create strong emotional engagement |
| **Lorenzo's Oil** | Chosen for its exploration of family dynamics in healthcare and the importance of provider empathy when families are advocating for patients. Demonstrates the impact of rare conditions and family-centered care approaches. | • Supporting families through rare/complex conditions  • Balancing medical expertise with family knowledge  • Managing hope vs. medical reality  • Addressing family advocacy and persistence  • Navigating disagreements about treatment approaches | • **Parent perspective:** Desperation, determination, advocacy, expert by experience  • **Medical community perspective:** Scientific evidence, professional limitations, ethical boundaries  • **Patient perspective:** Childhood illness, loss of abilities, family dynamics  • **Research community perspective**: Scientific method, funding priorities, time constraints | **SCT**: Demonstrates advocacy and persistence behaviors with family-centered care modeling  **TT**: Parental love and determination create powerful emotional transportation |
| **Dying Young** | Selected for its portrayal of caregiver relationships and the emotional impact of terminal illness on both patients and their support systems. Addresses end-of-life care and emotional boundaries in healthcare relationships. | • Managing emotional boundaries in long-term care  • Supporting patients through terminal illness  • Addressing caregiver burden and emotional investment  • Navigating relationship dynamics in healthcare  • Dealing with mortality and life-limiting conditions | • **Patient perspective:** Terminal diagnosis, dependency, desire for normalcy and love  • **Caregiver perspective:** Emotional attachment, sacrifice, personal growth through caring  • **Family perspective:** Grief, acceptance, relationship complexities  • **Medical perspective:** Palliative care, quality of life, prognosis communication | **SCT**: Models emotional boundary management and long-term empathic care strategies  **TT**: Love story framework enhances emotional engagement with caregiving themes |
| **Meeting with Teacher** | Included to demonstrate educational relationships and the impact of individual attention on student/patient development. Relevant to dental education and mentoring relationships with anxious or struggling patients. | • Recognizing individual patient needs and potential  • Providing encouragement and motivation  • Overcoming communication barriers  • Building confidence in vulnerable populations  • Addressing educational and social determinants of health | • **Student/Patient perspective:** Insecurity, potential, need for encouragement, cultural barriers  • **Teacher/Provider perspective:** Recognition of potential, dedication to individual success  • **Family perspective:** Hopes, limitations, cultural expectations  • **System perspective:** Resource constraints, standardized approaches vs. individualized care | **SCT**: Educational mentoring model transferable to patient care relationships  **TT**: Teacher-student dynamic creates identification opportunities for dental students |
| **Diagnosis** | Chosen for its exploration of diagnostic processes and the emotional journey of seeking answers for complex medical conditions. Relevant to dental diagnosis and the uncertainty patients experience during evaluation. | • Supporting patients through diagnostic uncertainty  • Managing anxiety during complex evaluations  • Communicating about unknown or rare conditions  • Addressing patient frustration with inconclusive results  • Validating patient experiences and symptoms | • **Patient perspective:** Frustration, uncertainty, validation needs, medical journey  • **Physician perspective:** Diagnostic challenges, professional limitations, persistence  • **Family perspective:** Support, shared uncertainty, advocacy  • **Healthcare system perspective:** Resource allocation, diagnostic protocols, speciality care | **SCT**: Models persistence and validation behaviors during uncertain diagnostic processes  **TT**: Medical mystery narrative maintains engagement while exploring empathic responses |
| **Kind Hearts** | Selected for its exploration of human nature, moral decision-making, and the complexity of ethical choices in healthcare contexts. Relevant to ethical dilemmas in dental practice and patient care decisions. | • Navigating ethical dilemmas in patient care  • Understanding complex motivations in healthcare decisions  • Addressing moral conflicts between personal and professional values  • Managing competing interests in treatment planning  • Recognizing the humanity in challenging patients or situations | • **Multiple character perspectives:** Various moral viewpoints, competing interests, and ethical complexity  • **Societal perspective:** Social norms, expectations, judgment  • **Individual perspective:** Personal moral development, decision-making processes  • **Professional perspective:** Ethical obligations, professional standards, and moral reasoning | **SCT**: Complex moral decision-making models applicable to ethical healthcare dilemmas  **TT**: Moral complexity creates cognitive engagement and perspective-taking opportunities |
| **Still Alice** | Chosen for its authentic portrayal of early-onset Alzheimer's disease and the progressive loss of cognitive abilities. Particularly relevant for understanding patient dignity, family dynamics, and communication adaptation with cognitive impairment. Demonstrates empathic responses to neurological conditions and maintaining personhood despite illness. | • Communicating with patients experiencing cognitive decline  • Maintaining patient dignity during progressive illness  • Supporting families through degenerative conditions  • Adapting communication strategies for cognitive limitations  • Addressing fear and anxiety about mental health conditions  • Managing loss of independence and identity | • **Patient perspective:** Fear of losing identity, frustration with cognitive decline, desire to maintain autonomy and dignity  • **Family perspective:** Grief for the person they're losing, caregiver burden, adaptation to changing relationships  • **Healthcare provider perspective:** Delivering difficult diagnoses, managing progressive conditions, balancing hope with reality  • **Professional perspective:** Workplace accommodation, career impact, social stigma around mental health | **SCT**: Models empathic communication adaptation for cognitive impairment with clear behavioral strategies  **TT**: Academic protagonist creates identification; progressive loss narrative generates profound emotional engagement |

**Legend:**

- **SCT** = Social Cognitive Theory
- **TT** = Transportation Theory
