# Supplementary material for: Cinema as a pedagogical tool for empathy training in dental education: A qualitative study
Source: Research Square preprint supplement (doi:10.21203/rs.3.rs-7355136/v1), 2025-09-05
Supplement: Supplementary file 3 [file de84974bf9d7cb719553f415.docx]

**Appendix 2: Focus group discussion guide (FGD guide)**

Introduction of participant and the interviewer

What is your perception about the module using cinema that you completed?

How was your experience in the module?

What were the strengths of the module?

What specific skills did you develop on completing the module?

What areas may require to be strengthened?

What has been the contribution of the module to your personal growth and professional development? How can this be further strengthened?

Should this be a compulsory module in the BDS curriculum?

How should it be offered and when during the program?

Will this module be accepted by students? Why do you say so?

Any other topics?
